# Supplementary material
Source: Research Square preprint supplement (doi:10.21203/rs.3.rs-9881225/v1)
Supplement: Supplementary file 1 [file 702c0bbcb2a9c884f9550195.pdf]

loocv\_results

| subject      | dice               | ncc                | elapsed_s          | reference       |
|--------------|--------------------|--------------------|--------------------|-----------------|
| AKZ03_final  | 0.9895265161233028 | 0.8833579126700074 | 496.7279658317566  | AKZ50_final.nii |
| AKZ05_final  | 0.9879947664999296 | 0.893893690192435  | 492.7428500652313  | AKZ50_final.nii |
| AKZ06_final  | 0.9864129596005172 | 0.8727484108331568 | 491.0677697658539  | AKZ50_final.nii |
| AKZ07_final  | 0.9883157262637826 | 0.8563726739138747 | 494.5301010608673  | AKZ50_final.nii |
| AKZ101_final | 0.9883363868329862 | 0.8724656197421704 | 493.77313780784607 | AKZ50_final.nii |
| AKZ102_final | 0.9893776429391024 | 0.8700641539676945 | 491.1307330131531  | AKZ50_final.nii |
| AKZ105_final | 0.9890497237526988 | 0.8893710103491552 | 486.3615770339966  | AKZ50_final.nii |
| AKZ106_final | 0.9887655000708824 | 0.8763553811656853 | 492.6450250148773  | AKZ50_final.nii |
| AKZ108_final | 0.98780992879338   | 0.8769637126615363 | 490.57291769981384 | AKZ50_final.nii |
| AKZ113_final | 0.9759560446708714 | 0.7445314165847065 | 493.6412789821625  | AKZ50_final.nii |
| AKZ115_final | 0.9890510438528144 | 0.8844042166456424 | 494.9472849369049  | AKZ50_final.nii |
| AKZ16_final  | 0.9855333917130532 | 0.7564328257129875 | 491.6668326854706  | AKZ50_final.nii |
| AKZ17_final  | 0.9802922620115944 | 0.80497984697229   | 493.8690049648285  | AKZ50_final.nii |
| AKZ18_final  | 0.987117032299117  | 0.8641975645204892 | 494.1329770088196  | AKZ50_final.nii |
| AKZ20_final  | 0.9860532765114438 | 0.8871890177366212 | 494.4355239868164  | AKZ50_final.nii |
| AKZ21_final  | 0.988934665681244  | 0.8937543185008588 | 493.0631287097931  | AKZ50_final.nii |
| AKZ22_final  | 0.9865840399854664 | 0.8713711346937907 | 492.5957589149475  | AKZ50_final.nii |
| AKZ23_final  | 0.9883173660023078 | 0.875138923178678  | 494.2297351360321  | AKZ50_final.nii |
| AKZ24_final  | 0.9884151026305372 | 0.8764289755294441 | 490.0959811210632  | AKZ50_final.nii |
| AKZ32_final  | 0.986622938231021  | 0.8770469302661982 | 490.8365411758423  | AKZ50_final.nii |
| AKZ34_final  | 0.9896393163195736 | 0.8888213564575587 | 494.9326627254486  | AKZ50_final.nii |
| AKZ35_final  | 0.9860389119310624 | 0.8577437989666518 | 492.9108190536499  | AKZ50_final.nii |
| AKZ37_final  | 0.989292772498839  | 0.8778782382582678 | 492.7236249446869  | AKZ50_final.nii |
| AKZ38_final  | 0.9719217248295526 | 0.6130052063404515 | 495.3225691318512  | AKZ50_final.nii |
| AKZ42_final  | 0.9869143441354866 | 0.8814322255897722 | 491.9916989803314  | AKZ50_final.nii |
| AKZ43_final  | 0.9872217483302668 | 0.8600276331365868 | 495.7645251750946  | AKZ50_final.nii |
| AKZ44_final  | 0.9899590500158878 | 0.8905265605081847 | 495.9509029388428  | AKZ50_final.nii |
| AKZ47_final  | 0.9885468974571684 | 0.8870407501808644 | 497.6081981658935  | AKZ50_final.nii |
| AKZ50_final  | 0.9877573580015744 | 0.8667199931468769 | 502.5271439552307  | AKZ32_final.nii |
| AKZ54_final  | 0.9892101391654282 | 0.8777724051803718 | 495.0048911571502  | AKZ50_final.nii |
| AKZ55_final  | 0.9891508974051306 | 0.8668608054854159 | 495.1656918525696  | AKZ50_final.nii |
| AKZ58_final  | 0.9894252202522816 | 0.878142774960944  | 496.05638098716736 | AKZ50_final.nii |
| AKZ59_final  | 0.9882264829759836 | 0.8868256065548888 | 495.569815158844   | AKZ50_final.nii |

|                     |                    |                    |                    |                 |
|---------------------|--------------------|--------------------|--------------------|-----------------|
| <b>AKZ62_final</b>  | 0.9887864184541176 | 0.874223755839315  | 497.6381781101227  | AKZ50_final.nii |
| <b>AKZ63_final</b>  | 0.98938162600302   | 0.8996776137439195 | 500.95164012908936 | AKZ50_final.nii |
| <b>AKZ64_final</b>  | 0.9894197888987692 | 0.8991930930726223 | 493.7364430427551  | AKZ50_final.nii |
| <b>AKZ67_final</b>  | 0.9900180205457996 | 0.8874079280571577 | 498.918576002121   | AKZ50_final.nii |
| <b>AKZ69_final</b>  | 0.9833862999127578 | 0.843450973225111  | 498.0565609931946  | AKZ50_final.nii |
| <b>AKZ71_final</b>  | 0.9870080476490924 | 0.8721467607741932 | 500.6932859420776  | AKZ50_final.nii |
| <b>AKZ72_final</b>  | 0.988630936856605  | 0.8845014505824246 | 526.9188430309296  | AKZ50_final.nii |
| <b>AKZ74_final</b>  | 0.9888681953436064 | 0.8820554963954391 | 509.6790850162506  | AKZ50_final.nii |
| <b>AKZ76_final</b>  | 0.982934395521876  | 0.8440003585077442 | 493.7424519062042  | AKZ50_final.nii |
| <b>AKZ78_final</b>  | 0.9899750842734344 | 0.8877702374965888 | 490.4025909900665  | AKZ50_final.nii |
| <b>AKZ81_final</b>  | 0.988596075543304  | 0.8746029818613157 | 491.04849672317505 | AKZ50_final.nii |
| <b>AKZ84_final</b>  | 0.9886580494109288 | 0.8679667560639491 | 489.6822199821472  | AKZ50_final.nii |
| <b>AKZ85_final</b>  | 0.987089355141376  | 0.8761358692132533 | 494.8884491920471  | AKZ50_final.nii |
| <b>AKZ88_final</b>  | 0.9888687570277712 | 0.8890071899181791 | 492.80283999443054 | AKZ50_final.nii |
| <b>AKZ89_final</b>  | 0.9844090204773528 | 0.858629706918509  | 490.2140271663666  | AKZ50_final.nii |
| <b>AKZ90_final</b>  | 0.9896705582472468 | 0.8844142679233706 | 496.6532099246979  | AKZ50_final.nii |
| <b>AKZ94_final</b>  | 0.9896043486828436 | 0.887345012356746  | 509.54800724983215 | AKZ50_final.nii |
| <b>AKZ95_final</b>  | 0.9830009063782532 | 0.8540178917668149 | 486.2246448993683  | AKZ50_final.nii |
| <b>AKZ99_final</b>  | 0.98710457540157   | 0.8772533901684119 | 486.3515410423279  | AKZ50_final.nii |
| <b>AKZ100_final</b> | 0.9869650579185243 | 0.8552163774482726 | 494.6645359992981  | AKZ81_final.nii |
| <b>AKZ114_final</b> | 0.9804427661378816 | 0.8363282278448444 | 486.0158460140228  | AKZ81_final.nii |
| <b>AKZ116_final</b> | 0.9824238184413823 | 0.8435721533628712 | 485.33334708213806 | AKZ81_final.nii |
| <b>AKZ118_final</b> | 0.977877104732153  | 0.785648433306279  | 488.5779752731323  | AKZ81_final.nii |
| <b>AKZ96_final</b>  | 0.986581661423658  | 0.8619274829260314 | 484.77113795280457 | AKZ81_final.nii |
| <b>AKZ97_final</b>  | 0.9880736636804125 | 0.8644790743938988 | 486.44781708717346 | AKZ81_final.nii |
